# Supplementary material
Source: publisher site journal article supplement (https://www.spandidos-publications.com/8629/downloadSupplementary)
Supplement: Supplementary file 1 [file downloadSupplementary]

## Sheet: ACHN
Table SIII. Quantitative PCR data.
Group	ADRB1			GAPDH
	Cq	Mean	SD	Cq	Mean	SD
siADRB1(NC)	27.1538	26.9314	0.262557	13.1344	13.0599	0.0647236
	26.6418			13.0183
	26.9986			13.0268
siADRB1(1)	29.348	29.1935	0.157932	12.972	12.9451	0.0398119
	29.2003			12.8993
	29.0323			12.9639
siADRB1(2)	30.1184	30.0686	0.0566181	13.1566	13.2843	0.243705
	30.007			13.131
	30.0805			13.5653
Group	ADRB2			GAPDH
	Cq	Mean	SD	Cq	Mean	SD
siADRB2(NC)	19.1017	19.1212	0.0179739	12.8483	12.8273	0.0296403
	19.125			12.8063
	19.137
siADRB2(1)	23.2598	23.3087	0.0569329	12.8438	12.8333	0.018065
	23.3712			12.8437
	23.295			12.8125
siADRB2(2)	21.5699	21.5156	0.0577372	12.9477	13.1453	0.307948
	21.455			12.9882
	21.5219			13.5002

## Sheet: admin_2021-08-06 10-50-56_BR008
Well	Target	Content	Sample	Cq	Starting Quantity (SQ)
B01	GAPDH	Unkn-02	siADRB1 (1)	12.972
B02	GAPDH	Unkn-02	siADRB1 (1)	12.8993
B03	GAPDH	Unkn-02	siADRB1 (1)	12.9639
B04	ADRB2	Unkn-10	siADRB1 (1)	19.2825
B05	ADRB2	Unkn-10	siADRB1 (1)	19.2533
B06	ADRB2	Unkn-10	siADRB1 (1)	19.2626
F01	ADRB1	Unkn-06	siADRB1 (1)	29.348
F02	ADRB1	Unkn-06	siADRB1 (1)	29.2003
F03	ADRB1	Unkn-06	siADRB1 (1)	29.0323
F04	BCL2	Unkn-14	siADRB1 (1)	23.7888
F05	BCL2	Unkn-14	siADRB1 (1)	24.0186
F06	BCL2	Unkn-14	siADRB1 (1)	23.719
C01	GAPDH	Unkn-03	siADRB1 (2)	13.1566
C02	GAPDH	Unkn-03	siADRB1 (2)	13.131
C03	GAPDH	Unkn-03	siADRB1 (2)	13.5653
C04	ADRB2	Unkn-11	siADRB1 (2)	20.0735
C05	ADRB2	Unkn-11	siADRB1 (2)	20.0024
C06	ADRB2	Unkn-11	siADRB1 (2)	20.0048
G01	ADRB1	Unkn-07	siADRB1 (2)	30.1184
G02	ADRB1	Unkn-07	siADRB1 (2)	30.007
G03	ADRB1	Unkn-07	siADRB1 (2)	30.0805
G04	BCL2	Unkn-15	siADRB1 (2)	24.2904
G05	BCL2	Unkn-15	siADRB1 (2)	24.2896
G06	BCL2	Unkn-15	siADRB1 (2)	24.2963
D01	GAPDH	Unkn-04	siADRB1 (3)	13.0864
D02	GAPDH	Unkn-04	siADRB1 (3)	13.0809
D03	GAPDH	Unkn-04	siADRB1 (3)	13.5067
D04	ADRB2	Unkn-12	siADRB1 (3)	19.8871
D05	ADRB2	Unkn-12	siADRB1 (3)	19.8776
D06	ADRB2	Unkn-12	siADRB1 (3)	20.0092
H01	ADRB1	Unkn-08	siADRB1 (3)	31.0215
H02	ADRB1	Unkn-08	siADRB1 (3)	30.5057
H03	ADRB1	Unkn-08	siADRB1 (3)	30.3787
H04	BCL2	Unkn-16	siADRB1 (3)	24.5684
H05	BCL2	Unkn-16	siADRB1 (3)	24.5209
H06	BCL2	Unkn-16	siADRB1 (3)	24.4887
A01	GAPDH	Unkn-01	siADRB1 NC	13.1344
A02	GAPDH	Unkn-01	siADRB1 NC	13.0183
A03	GAPDH	Unkn-01	siADRB1 NC	13.0268
A04	ADRB2	Unkn-09	siADRB1 NC	19.1559
A05	ADRB2	Unkn-09	siADRB1 NC	19.0181
A06	ADRB2	Unkn-09	siADRB1 NC	19.0949
E01	ADRB1	Unkn-05	siADRB1 NC	27.1538
E02	ADRB1	Unkn-05	siADRB1 NC	26.6418
E03	ADRB1	Unkn-05	siADRB1 NC	26.9986
E04	BCL2	Unkn-13	siADRB1 NC	24.483
E05	BCL2	Unkn-13	siADRB1 NC	24.4145
E06	BCL2	Unkn-13	siADRB1 NC	24.3612
B07	GAPDH	Unkn-18	siADRB2 (1)	12.8438
B08	GAPDH	Unkn-18	siADRB2 (1)	12.8437
B09	GAPDH	Unkn-18	siADRB2 (1)	12.8125
B10	ADRB2	Unkn-26	siADRB2 (1)	23.2598
B11	ADRB2	Unkn-26	siADRB2 (1)	23.3712
B12	ADRB2	Unkn-26	siADRB2 (1)	23.295
F07	ADRB1	Unkn-22	siADRB2 (1)	27.4807
F08	ADRB1	Unkn-22	siADRB2 (1)	27.5923
F09	ADRB1	Unkn-22	siADRB2 (1)	27.6533
F10	BCL2	Unkn-30	siADRB2 (1)	25.4661
F11	BCL2	Unkn-30	siADRB2 (1)	25.4632
F12	BCL2	Unkn-30	siADRB2 (1)	25.4865
C07	GAPDH	Unkn-19	siADRB2 (2)	12.9477
C08	GAPDH	Unkn-19	siADRB2 (2)	12.9882
C09	GAPDH	Unkn-19	siADRB2 (2)	13.5002
C10	ADRB2	Unkn-27	siADRB2 (2)	21.5699
C11	ADRB2	Unkn-27	siADRB2 (2)	21.455
C12	ADRB2	Unkn-27	siADRB2 (2)	21.5219
G07	ADRB1	Unkn-23	siADRB2 (2)	27.6645
G08	ADRB1	Unkn-23	siADRB2 (2)	27.5842
G09	ADRB1	Unkn-23	siADRB2 (2)	27.7078
G10	BCL2	Unkn-31	siADRB2 (2)	24.0576
G11	BCL2	Unkn-31	siADRB2 (2)	24.0753
G12	BCL2	Unkn-31	siADRB2 (2)	24.1161
D07	GAPDH	Unkn-20	siADRB2 (3)	12.8553
D08	GAPDH	Unkn-20	siADRB2 (3)	12.7832
D09	GAPDH	Unkn-20	siADRB2 (3)	13.3527
D10	ADRB2	Unkn-28	siADRB2 (3)	21.0799
D11	ADRB2	Unkn-28	siADRB2 (3)	21.0037
D12	ADRB2	Unkn-28	siADRB2 (3)	21.0179
H07	ADRB1	Unkn-24	siADRB2 (3)	27.8843
H08	ADRB1	Unkn-24	siADRB2 (3)	27.8838
H09	ADRB1	Unkn-24	siADRB2 (3)	28.0396
H10	BCL2	Unkn-32	siADRB2 (3)	24.0061
H11	BCL2	Unkn-32	siADRB2 (3)	24.0101
H12	BCL2	Unkn-32	siADRB2 (3)	23.9965
A07	GAPDH	Unkn-17	siADRB2 NC	12.8483
A08	GAPDH	Unkn-17	siADRB2 NC	12.8063
A10	ADRB2	Unkn-25	siADRB2 NC	19.1017
A11	ADRB2	Unkn-25	siADRB2 NC	19.125
A12	ADRB2	Unkn-25	siADRB2 NC	19.137
E07	ADRB1	Unkn-21	siADRB2 NC	25.7892
E08	ADRB1	Unkn-21	siADRB2 NC	25.8104
E09	ADRB1	Unkn-21	siADRB2 NC	25.8557
E10	BCL2	Unkn-29	siADRB2 NC	24.3035
E11	BCL2	Unkn-29	siADRB2 NC	24.254
E12	BCL2	Unkn-29	siADRB2 NC	24.2633
File Name	admin_2021-08-06 10-50-56_BR008389.pcrd
Created By User	admin
Notes
ID
Run Started	08/06/2021 01:51:13 UTC
Run Ended	08/06/2021 03:41:42 UTC
Sample Vol	20
Lid Temp	105
Protocol File Name	ABI PowerTrack SYBR Green.prcl
Plate Setup File Name	2021.8.6 ACHN siADRB1, 2.pltd
Base Serial Number	BR008389
Optical Head Serial Number	788BR08370
CFX Maestro Version	4.1.2433.1219.
Well group	All Wells
Amplification step	3
Melt step	5
